# Supplementary material for: In situ formation of polymer–protein hybrid spherical aggregates from (nitrilotriacetic acid)-end-functionalized polystyrenes and His-tagged proteins
Source: Royal Society of Chemistry journal article supplement (doi:10.1039/c2py21077k), 2013-01-01
Supplement: c2py21077k.pdf [file c2py21077k.pdf]

## Electronic Supplementary Information

# In Situ Formation of Polymer-Protein Hybrid Spherical Aggregates from (Nitrilotriacetic Acid)-End-Functionalized Polystyrenes and His-Tagged Proteins

Mohammad Abdul Kadir<sup>a</sup>, Chaeyeon Lee<sup>a</sup>, Ho Seok Han<sup>a</sup>, Bong-Soo Kim<sup>a</sup>, Eun-Ju Ha<sup>a</sup>,  
Jonghwa Jeong<sup>a</sup>, Jae Kwang Song<sup>b</sup>, Sun-Gu Lee<sup>c</sup>, Seong Soo A. An<sup>d</sup>, and Hyun-jong Paik<sup>\*a</sup>

<sup>a</sup>Department of Polymer Science & Engineering, Pusan National University,

<sup>c</sup>Department of Chemical Engineering, Pusan National University,

Busandaehak-ro 63 beon-gil, Geumjeong-gu, Busan 609-735, Korea

<sup>b</sup>Chemical Biotechnology Research Center, Korea Research Institute of Chemical Technology, P.O. Box  
107, Yuseong-gu, Daejeon 305-600, Korea

<sup>d</sup>Department of BioNano Technology, Gachon University,

Seongnamdaero, Sujeong-gu, Seongnam-si 461-701, Korea

## Gene cloning of the His-tagged lipases

The lipase genes (GenBank accession numbers AAC73578 and CAD00528) were amplified using the bacterial genomic DNA of *Escherichia coli* K-12 and *Listeria monocytogenes*. The genomic DNA samples were available from American Type Culture Collection. The forward and the reverse primers contained *Bam*HI and *Pst*I restriction sites, respectively, just before and after each open reading frame. After a standard PCR reaction was performed, the PCR products were cloned into the pCR2.1-TOPO vector (Invitrogen) and then sequenced to ensure a correct gene

amplification. Restriction enzyme-digested fragments were ligated into pET21-a plasmid linearized with the same enzymes to produce the expression plasmids pET21a-21H and pET21a-83H. *E. coli* JM109 cells were transformed by electroporation (Gene Pulser Xcell; Bio-Rad) with the plasmids, according to the procedures previously reported.<sup>1</sup>

### **Expression and purification of His-tagged enzymes**

*E. coli* cells were grown at 37°C in 100 mL of Luria-Bertani medium supplemented with ampicillin (100 µg/mL) until an OD<sub>600</sub> of 0.6 and then induced with different concentrations of isopropyl β-D-1-thiogalactopyranoside (IPTG). After 16 h of cultivation at 18°C, the cells were harvested by centrifugation at 9,800 g for 15 min and resuspended in Native IMAC lysis buffer (300 mM KCl, 50 mM KH<sub>2</sub>PO<sub>4</sub>, 5 mM imidazole, pH 8.0, Bio-Rad). The resuspended cells were lysed with sonication (VCX 750; Sonics & Materials Inc., USA) and centrifuged at 12,000 g for 30 min at 4°C. The supernatants were filtered through a 0.45 µm filter and used as a source for intracellular soluble proteins. Three histidine-tagged enzymes were purified by immobilized metal affinity chromatography (IMAC) using the Profinia protein purification system (Bio-Rad) according to the manufacturer's instructions. The purification procedure using the Bio-Scale Mini Profinity IMAC cartridge (1 mL, Bio-Rad) and the Bio-Scale Mini Bio-Gel1 P-6 desalting cartridge (10 ml, Bio-Rad) were adopted. The enzyme purity was estimated by denaturing sodium dodecyl sulfate-polyacrylamide gel electrophoresis in eluted fractions using 10% polyacrylamide gels. The protein concentrations were determined using the Bradford assay kit (Bio-Rad) with bovine serum albumin as a standard. The purity of the sample was shown on SDS-PAGE and quantified by the microfluidics-based electrophoresis system (Experion and Quantity One software; Bio-Rad).

### Characterization of polymer (NTA-PS, $M_n \sim 21,800$ )

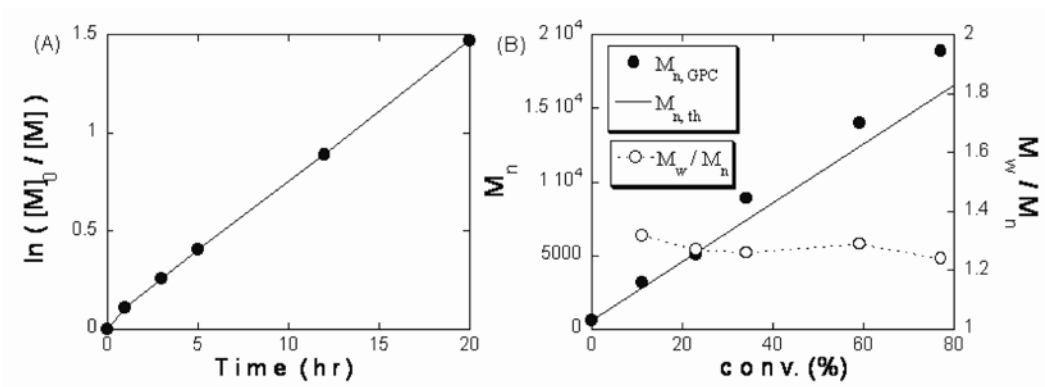

**Fig. S1** Results of polymerization: (A) First-order kinetic plot, (B)  $M_n$  and  $M_w/M_n$  evolution on monomer conversion.

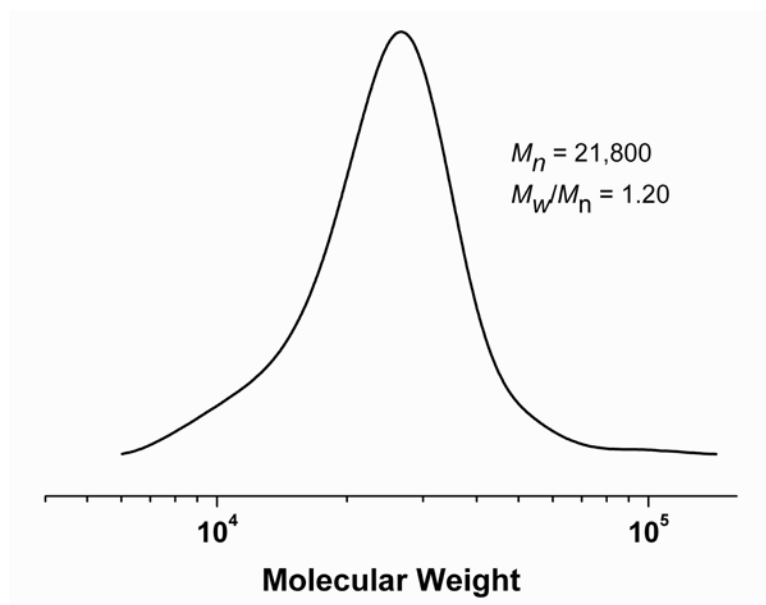

**Fig. S2** Gel permeation chromatogram traces of NTA-PS.

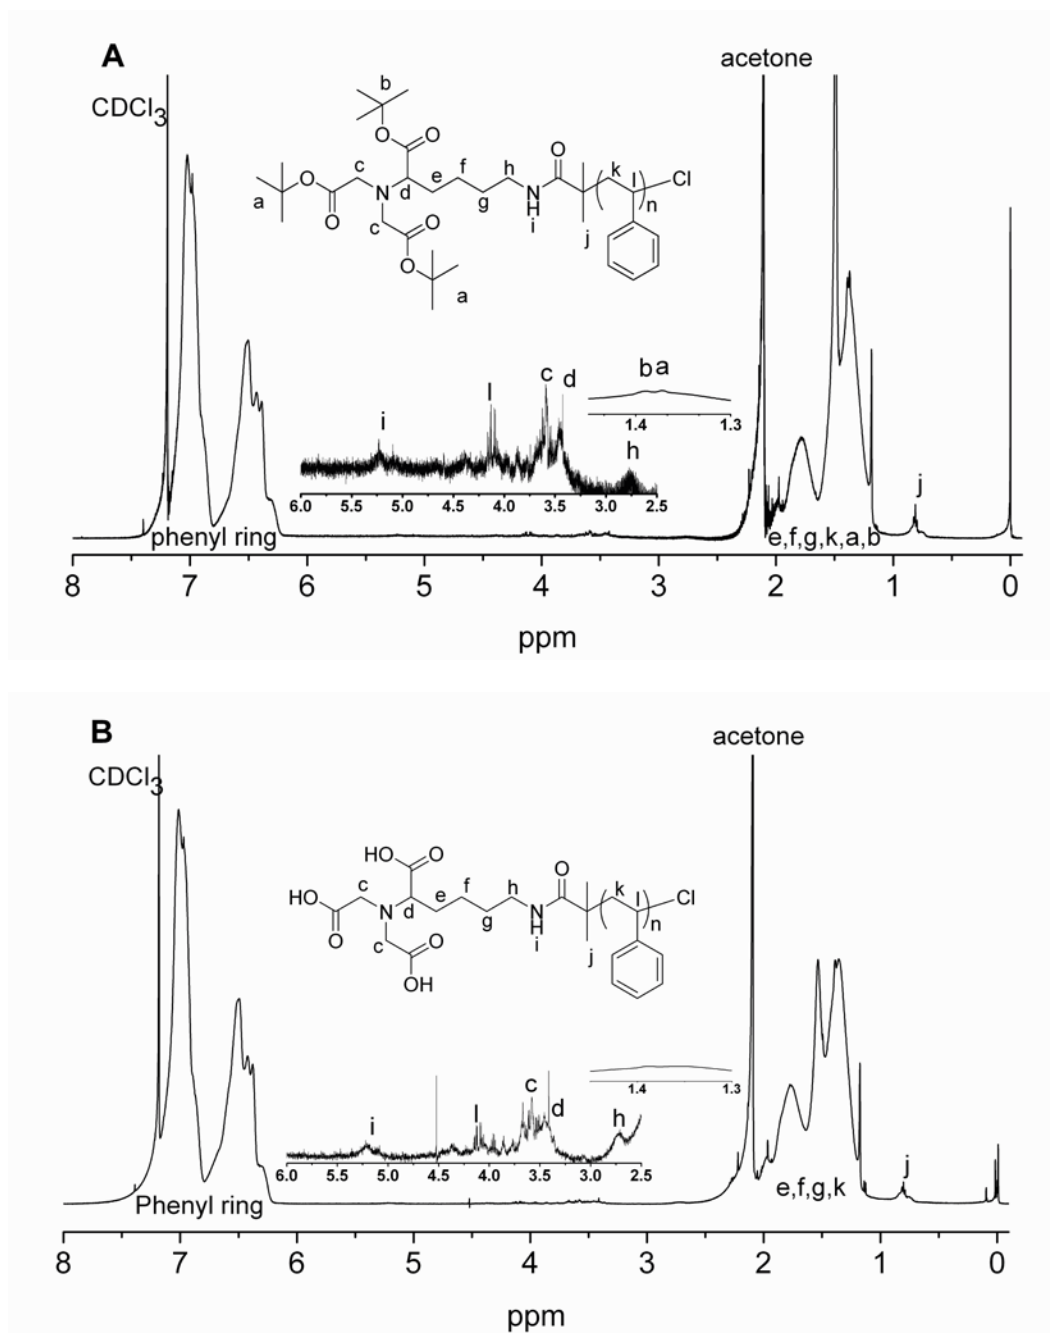

**Fig. S3** (A) <sup>1</sup>H NMR spectra of α-(p-NTA)-polystyrene, CDCl<sub>3</sub> 100%, and (B) α-(NTA)-polystyrene, mixed solvent system (CDCl<sub>3</sub>/MeOH-*d*<sub>4</sub> = 99/1 by vol. %).

**Characterization of polymer (NTA-PS, *M*<sub>n</sub>~4900)**

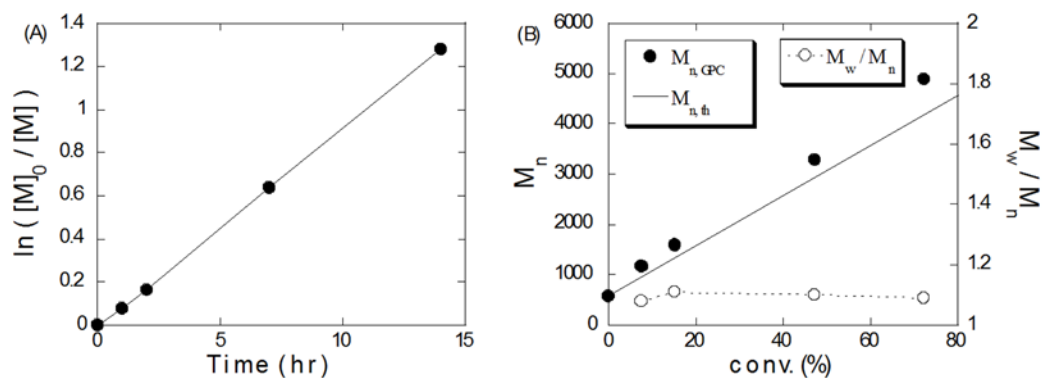

**Fig. S4** Results of polymerization: (A) first-order kinetic plots, (B)  $M_n$  and  $M_w/M_n$  evolution on monomer conversion.

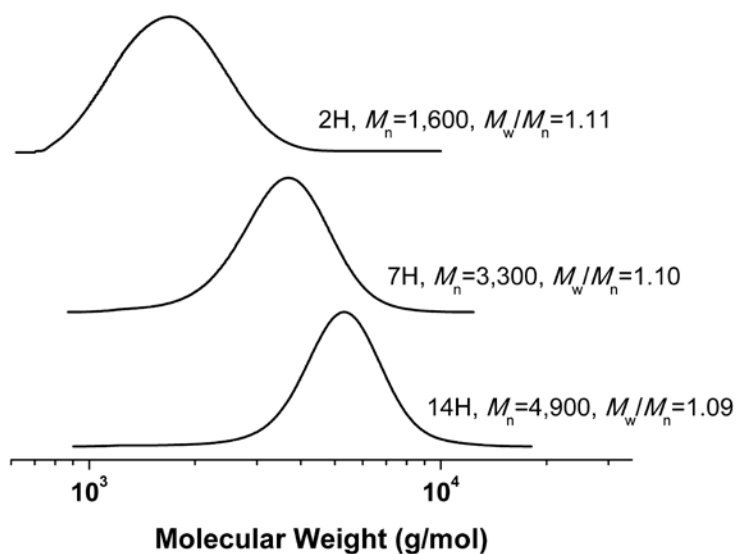

**Fig. S5** Gel permeation chromatogram traces of NTA-PS.

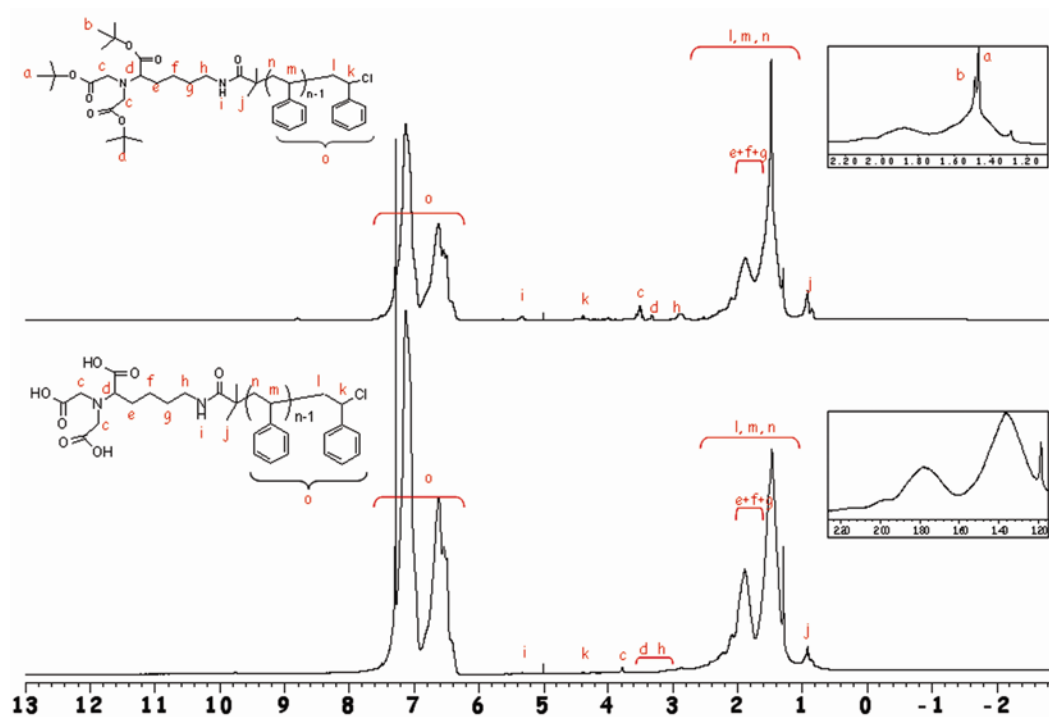

**Fig. S6**  $^1\text{H}$  NMR spectra of  $\alpha$ -(p-NTA)-polystyrene, ( $M_n$ , GPC = 4,900;  $M_w/M_n$  = 1.09) and  $\alpha$ -(NTA)-polystyrene, ( $M_n$ , GPC = 4,700;  $M_w/M_n$  = 1.40).

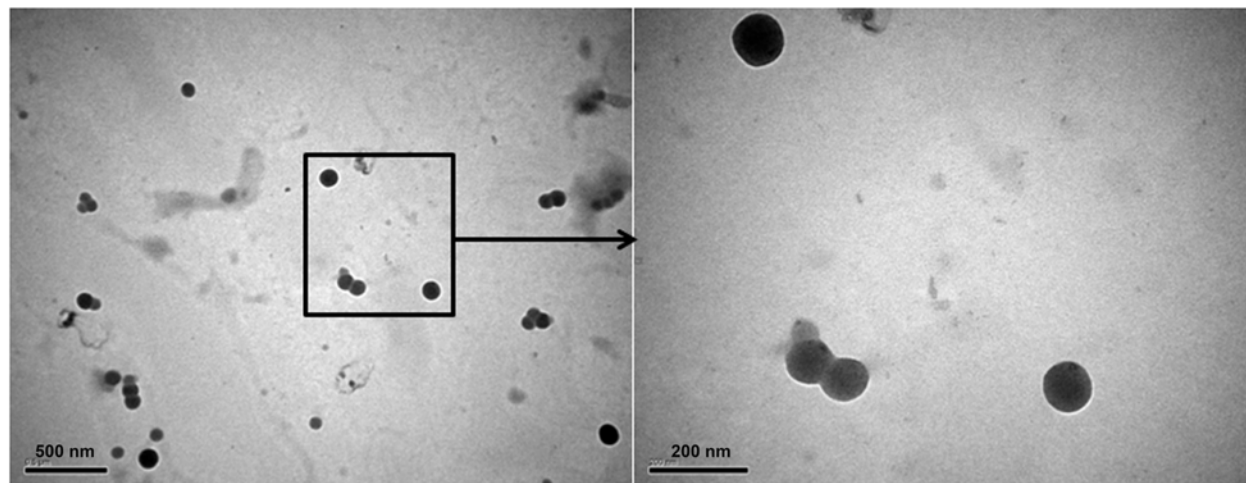

**Fig. S7** Polymer-protein hybrid aggregates obtained from nickel complexed (nitrilotriacetic acid)-end-functionalized polystyrene (Ni-NTA-PS,  $M_n \sim 21,800$ ) with His<sub>6</sub>-GFP in water/DMF (DMF 4 vol %): TEM images (A) at lower resolution, and (B) at higher resolution.

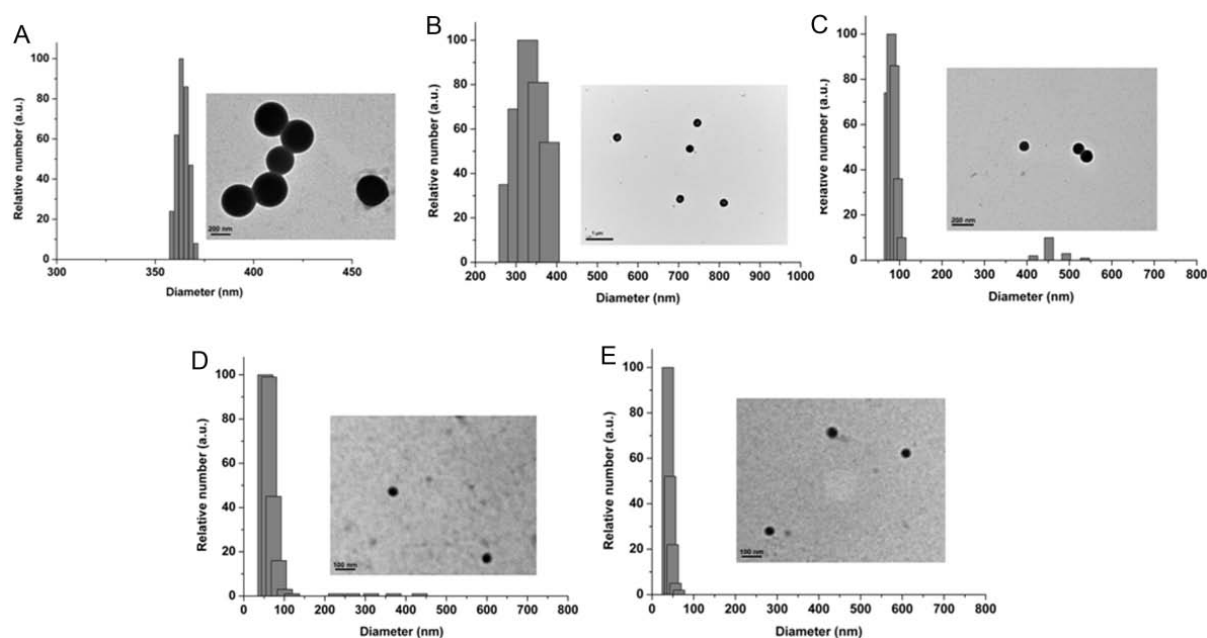

**Fig. S8** Effect of polymer (Ni-NTA-PS,  $M_n \sim 4,900$ ) and protein concentration (His<sub>6</sub>-GFP) on the size of polymer-protein hybrid aggregates: DLS data and TEM images for (A) 0.125 mg Ni-NTA-PS and 540  $\mu$ g His<sub>6</sub>-GFP, (B) 0.0625 mg Ni-NTA-PS and 270  $\mu$ g His<sub>6</sub>-GFP, (C) 0.03125 mg Ni-NTA-PS and 135  $\mu$ g His<sub>6</sub>-GFP, (D) 0.003125 mg Ni-NTA-PS and 13.5  $\mu$ g His<sub>6</sub>-GFP, and (E) 0.001562 mg Ni-NTA-PS and 6.75  $\mu$ g His<sub>6</sub>-GFP. Polymer and His<sub>6</sub>-GFP were dissolved in 0.1 mL DMF and 2.5 mL water (pH 7.4) respectively. And the addition rate of polymer

solution to protein solution was 0.01 mL/h. Polymer solution was prepared by stepwise dilution from higher concentration.

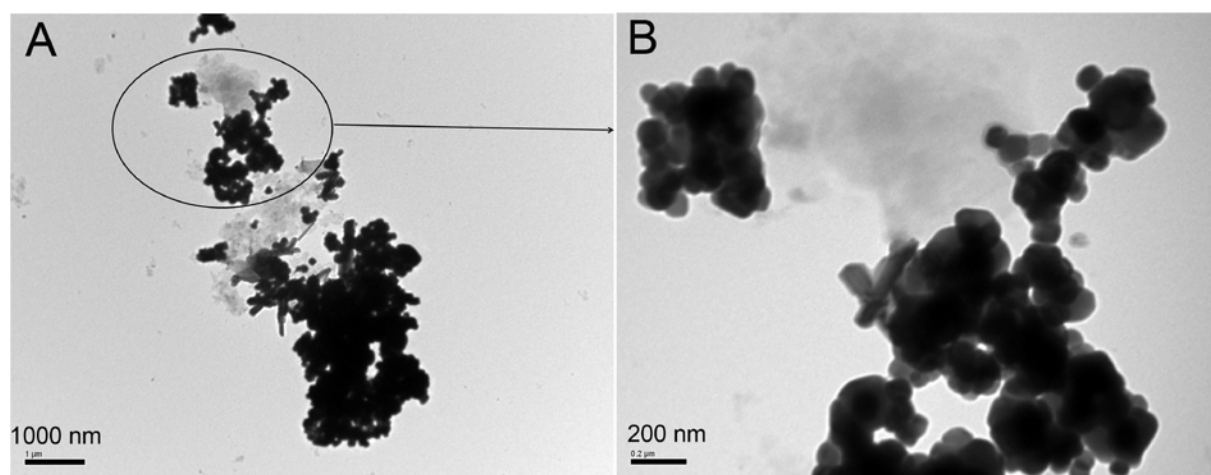

**Fig. S9** TEM images of polymer-protein hybrid aggregates obtained from nickel complexed (nitrilotriacetic acid)-end-functionalized polystyrene (Ni-NTA-PS,  $M_n \sim 21,800$ ) with His<sub>6</sub>-GFP in water/DMF (DMF 4 vol %) after removal of DMF by dialysis (2 day): (A) at lower resolution, and (B) at higher resolution.

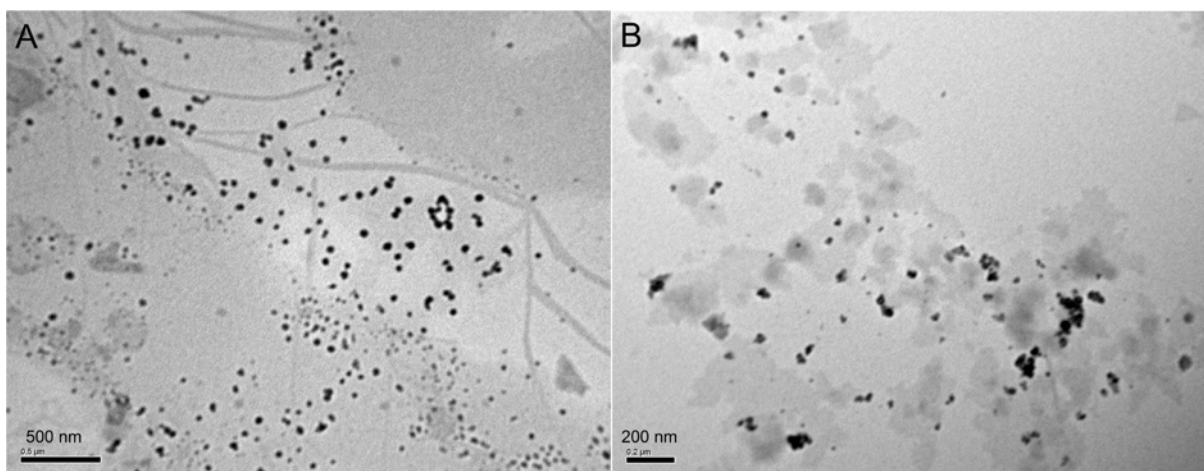

**Fig. S10** TEM images after addition of excess imidazole (250 mM) to the solution of polymer-protein hybrid aggregates obtained from nickel complexed (nitrilotriacetic acid)-end-functionalized polystyrene (Ni-NTA-PS,  $M_n \sim 21,800$ ) and His<sub>6</sub>-GFP in water/DMF (DMF 4 vol %): (A) after 1 day of addition, and (B) after 6 days of addition. DMF was removed by dialysis before addition of imidazole.

## References

- 1 E. Yu, M.-A. Kwon, M. Lee, J. Oh, J.-E. Choi, J. Lee, B.-K. Song, D.-H. Hahm and J. Song, *Appl. Microbiol. Biotechnol.*, 2011, **90**, 573.
